# Supplementary material
Source: publisher figshare collection journal article supplement (https://aacr.figshare.com/ndownloader/files/39875964)
Supplement: Supplementary file 1 [file 39875964]

1  
2

## Supplemental Information

## Supplemental Methods

**HOMA-IR** Homeostatic model assessment of insulin resistance (HOMA-IR) was employed to measure the fasting insulin levels in serum samples using a mouse Insulin ELISA kit (Cat. No. N04572, Jining Industrial, China) or a human Insulin ELISA kit (Cat. No. N191211, Jining Industrial, China). Fasting blood glucose levels were measured using the Aviva glucometer before killing animals after 6 h starvation. The values were calculated using the following formula: Fasting glucose  $(\text{mg dL}^{-1}) \times \text{fasting insulin } (\text{mU L}^{-1})/405$ .

**Hyperglycemia models** Glucose (Cat. No. MB2510, Meilunbio, China), fructose (Cat. No. MB2500, Meilunbio, China), and sucrose (Cat. No. MB2466, Meilunbio, China) were dissolved in drinking water at the dose of 2.5% w/v, 5% w/v, and 5% w/v. Drinking solutions were given ad libitum to the mice. The diabetes model was induced in mice by intraperitoneally injecting streptozotocin (Cat. No. MB1227, Meilunbio, China) at a single dose of 60 mg/kg. Food intake and water intake of mice were measured on a daily basis. Peripheral platelets and red blood cells were analysed by a haematology analyser (Cat. No. BC-2600, Mindray, China). The total protein and glucose in the urine were detected by a urine diagnosis kit (Cat. No. 8V, Urit, China) according to the manufacturer's instructions.

**Enzyme-linked immunosorbent assay** Serum samples were collected and were stored at  $-80^{\circ}\text{C}$  till further analysis. Platelets were lysed in a RIPA buffer with the proteinase and phosphatase inhibitor cocktail (Cat. No. MA0151, Meilunbio, China; Cat. No. MB2678, Meilunbio, China; 1:100), followed by a 10-minute centrifugation. Supernatants were stored at  $-80^{\circ}\text{C}$  till further analysis. Mouse Insulin ELISA (Cat. No.

1 N04572, Jining Industrial, China), human Insulin ELISA (Cat. No. N191211, Jining  
2 Industrial, China), and mouse TxA<sub>2</sub> ELISA (Cat. No. E-EL-0057c, Elabscience, China)  
3 were performed according to the manufacturer's protocol using the appropriate  
4 standard curve. Absorbance values were detected at 450 nm using a Synergy 2 Multi-  
5 Mode Microplate Reader (BioTek).

6

7 **Transmission electron microscopy and scanning electron microscopy** For

8 Transmission electron microscopy, the platelets were fixed by 2.5% glutaraldehyde in

9 Tyrode's buffer for 1.5 h at room temperature and then pelleted by centrifugation at

10 1500 g for 5 min. The pellet was washed and post-fixed with 1% osmium tetroxide in

11 Tyrode's buffer supplemented with sucrose (25 mg/ml) for 2 h. The samples were

12 dehydrated in ascending ethanol concentrations, acetone, propylene oxide, and

13 embedded. Polymerization was performed under increasing temperatures from 37 °C

14 to 60 °C for 3 d. Ultrathin sections were cut using an Ultracut E system (Leica, Germany)

15 and stained with saturated aqueous uranyl acetate and lead citrate. The specimens were

16 examined using a Tecnai G2 Spirit electron microscope (FEI, Netherlands) at an

17 operating voltage of 120 kV. For scanning electron microscopy, cell samples were fixed

18 in 2.5% glutaraldehyde in PBS buffer (pH 7.4) and post-fixed in 1% OsO<sub>4</sub>. Dehydration

19 was carried out in an ethanol dilution series (30%, 50%, 70%, and 90%, followed by

20 3× 100%). After critical drying with an automated critical point dryer (Cat. No. EM

21 CPD300, Leica,), the samples were mounted on double-sided carbon tape on holders

22 and plasma-coated with 8 nm gold. Pictures were taken using a conventional scanning

23 electron microscope (Cat. No. Helios, Thermo Fisher).

24

1 **Platelet aggregometry** Turbidometric platelet aggregation was performed in platelet-  
2 rich plasma in response to 10  $\mu$ M ADP (Cat. No. MB1706, Meilunbio, China).  
3 Aggregation was assessed as maximal aggregation at 6 min after agonist challenge.  
4 Results were recorded by an aggregometer (Cat. No. Aggram, Helena, UK).

5

6 ***In vivo* model of arterial thrombosis** Platelets were isolated from mice and treated *ex*  
7 *vivo* with vehicle or 20  $\mu$ M MKT-077 (Cat. No. A12388, AdooQ Bioscience) solution  
8 for 30 min. After the treatment, platelets were labelled with 1 mM calcein (Cat. No.  
9 148504-34-1, Sigma-Aldrich) solution for 20 min. At the same time, male C57BL/6  
10 mice were anesthetized and mesenteric arterioles were exposed. FeCl<sub>3</sub> injury was  
11 performed by applying a filter paper saturated with 10% FeCl<sub>3</sub> onto the mesenteric  
12 arteriole for 2 min. After FeCl<sub>3</sub> injury, calcein-labelled mouse platelets were  
13 immediately injected intravenously. Thrombi started forming after approximately 5  
14 minutes and the complete thrombosis process was recorded using fluorescent  
15 microscopy (Cat. No. TE2000-U, Nikon, Japan) for 10 minutes.

16

17 ***In vitro* clot retraction** Clot formation was initiated by adding 300  $\mu$ l platelet-rich  
18 plasma to siliconized vials containing 1 U/ml thrombin (Cat. No. MB1368, Meilunbio,  
19 China) and 20 mM CaCl<sub>2</sub> (Cat. No. 10005861, Sinopharm, China). Reaction tubes were  
20 gently mixed for 5 s, and were incubated at room temperature for 45 min. The retraction  
21 was quantified by measuring the volume of the remaining serum after clot formation.

22

23 **Tail bleeding assay** Animals were placed in a prone position. A distal 10 mm segment  
24 of the tail was amputated with a scalpel. The tail was immediately immersed in a 50-

- 1 ml tube containing pre-warmed isotonic saline. The tail tip was positioned about 2 cm
- 2 below the body and was monitored for 10 min. Bleeding time was recorded.
- 3

# Supplemental Tables

**Table 1. Primer pairs used for glucose metabolism-related gene array in mouse**

**MKs**

| Gene name      | Forward primer (5'- 3')  | Reverse primer (5'- 3') |
|----------------|--------------------------|-------------------------|
| <i>Pik3ca</i>  | CCACGACCATCTTCGGGTG      | ACGGAGGCATTCTAAAGTCACTA |
| <i>Akt</i>     | ATGAACGACGTAGCCATTGTG    | TTGTAGCCAATAAAGGTGCCAT  |
| <i>Prkcb</i>   | GTGTCAAGTCTGCTGCTTTGT    | GTAGGACTGGAGTACGTGTGG   |
| <i>Tas1r2</i>  | TGCTCTGCCTAAGCCAGTC      | CTCTTCACGTTGGCATGGAGG   |
| <i>Aldh3a1</i> | AATATCAGTAGCATCGTGAACCG  | GGAGAGCCCCTTAATCGTGAAA  |
| <i>Pklr</i>    | TCAAGGCAGGGATGAACATTG    | CACGGGTCTGTAGCTGAGTG    |
| <i>Dld</i>     | GAGCTGGAGTCGTGTGTACC     | CCTATCACTGTCACGTCAGCC   |
| <i>Grp75</i>   | ATGGCTGGAATGGCCTTAGC     | GCACCCTTGATTGCTTCTGATG  |
| <i>Bpgm</i>    | GGACCAGAACTTAACAACGACG   | CAGGCTGTGTGAATGGACCT    |
| <i>Pgam1</i>   | TCTGTGCAGAAGAGAGCAATCC   | CTGTCAGACCGCCATAGTGT    |
| <i>Dlat</i>    | CTTTAGCCTCCAAAGCGAGAG    | AGATTGTAAATGTTCCACCCTGG |
| <i>Aldc</i>    | AGAAGGAGTTGTCTGGATATTGCT | TTCTCCACCCCAATTTGGCTC   |
| <i>Ldha</i>    | TGTCTCCAGCAAAGACTACTGT   | GACTGTACTTGACAATGTTGGGA |
| <i>Cck</i>     | AAGAGCGGCGTATGTCTGTG     | CATCCAGCCCATGTAGTCCC    |
| <i>Slc2a4</i>  | GTGACTGGAACACTGGTCCTA    | CCAGCCACGTTGCATTGTAG    |
| <i>Gpr</i>     | TTTTCAAGTGACATTTCCTCGCC  | GCACATAGACACAGAAGGGAGA  |
| <i>Plcb</i>    | GCCCCTGGAGATTCTGGAGT     | GGGAGACTTGAGGTTTACCTTT  |
| <i>Akr1a1</i>  | AGCCTGGTCAGGTGAAAGC      | GGCCTCCCCAATCTCAGTT     |
| <i>Slc2a5</i>  | CCAATATGGGTACAACGTAGCTG  | GCGTCAAGGTGAAGGACTCAATA |
| <i>Lct</i>     | AGTGAAAGTTTTCTGTCTACACCC | CTGGACGTACAGCTCAGGAAG   |
| <i>Pgm3</i>    | TACCTGTGTATTGCACCAAACT   | AGAGCCAGGATAGCCTCAATC   |
| <i>Pkm</i>     | GCCGCCTGGACATTGACTC      | CCATGAGAGAAATTCAGCCGAG  |
| <i>Mgam</i>    | ATGGAGAGTGACGTTGTAAACAC  | GGAAGCGATTTGATGTCTGGTA  |
| <i>Pgk1</i>    | ATGTCGCTTTCCAACAAGCTG    | GCTCCATTGTCCAAGCAGAAT   |
| <i>Gnat3</i>   | TAGGAGCCGAGAGGACCAAG     | GCTGGTATTTCAGATGCCCTTTC |
| <i>Prkca</i>   | GTTTACCCGGCCAACGACT      | GGGCGATGAATTTGTGGTCTT   |
| <i>Hk2</i>     | TGATCGCCTGCTTATTCACGG    | AACCGCCTAGAAATCTCCAGA   |
| <i>Ldhc</i>    | TTCACGGTGTAAGATTACTGTGG  | TCGTATCAGCGTCAACAAGGG   |
| <i>Pfkm</i>    | TGTGGTCCGAGTTGGTATCTT    | GCACTTCCAATCACTGTGCC    |
| <i>Slc2a1</i>  | CAGTTCGGCTATAACACTGGTG   | GCCCCCGACAGAGAAGATG     |
| <i>Fbp1</i>    | CACCGCGATCAAAGCCATCT     | AGGTAGCGTAGGACGACTTCA   |
| <i>Aldh5a</i>  | CGGTCAAGGAGAGGAGCTTAC    | GGACTAGCCCTCGCTTATCTTT  |
| <i>Pgam2</i>   | TGGAACCAAGAGAACCGTTTC    | TGGCATCTTTGATAGCGGTGG   |
| <i>Ald</i>     | AAATCTACCCTCTAGTACGGCAG  | TTTCCCGGCACAAGACTCG     |
| <i>Eno3</i>    | CACAGCCAAGGGTTCGATTCC    | CCCAGGTATCGTGCTTTGTCT   |
| <i>Ldhbr</i>   | CATTGCGTCCGTTGCAGATG     | GGAGGAACAAGCTCCCGTG     |
| <i>Eno1</i>    | TGCGTCCACTGGCATCTAC      | CAGAGCAGGCGCAATAGTTTTA  |

1 **Table 2. Primer pairs used for *Grp75* promoter binding transcription factor gene**

2 **array in mouse MKs**

3

| <b>Gene name</b> | <b>Forward primer (5' - 3')</b> | <b>Reverse primer (5' - 3')</b> |
|------------------|---------------------------------|---------------------------------|
| <i>Esr1</i>      | CCTCCCGCCTTCTACAGGT             | CACACGGCACAGTAGCGAG             |
| <i>Pax5</i>      | CCATCAGGACAGGACATGGAG           | GGCAAGTTCCACTATCCTTTGG          |
| <i>Nr3c1</i>     | AGCTCCCCCTGGTAGAGAC             | GGTGAAGACGCAGAAACCTTG           |
| <i>Gtf2ird1</i>  | TTCGTCCTCTAACCCAGAGTC           | ACAGAATTAGGGTGAAGTTCGGA         |
| <i>Tob</i>       | AGAACAATCCAGACTAGCAGCA          | GGGAAC TTCACATCACAGCTC          |
| <i>Stat4</i>     | TGGCAACAATTCTGCTTCAAAAC         | GAGGTCCCTGGATAGGCATGT           |
| <i>Hnf1a</i>     | GACCTGACCGAGTTGCCTAAT           | CCGGCTCTTTCAGAATGGGT            |
| <i>Hoxd10</i>    | ACCTATGGAATGCAAACCTGTG          | TCTGTCCA ACTGTCTACTTGAGG        |
| <i>Hoxd9</i>     | GCACCCTCAGCAACTACTACG           | AAA ACTACACGAGGCGAACTC          |
| <i>Myc</i>       | ATGCCCCTCAACGTGAACTTC           | CGCAACATAGGATGGAGAGCA           |
| <i>Sry</i>       | GCTGGGATGCAGGTGGAAAA            | CCCTCCGATGAGGCTGATATT           |
| <i>Tfap2a</i>    | TTTTTCAGCTATGGACCGTCAC          | GAAGTCGGCATTAGGGGTG             |
| <i>Lrf2</i>      | AATTCCAATACGATACCAGGGCT         | GAGCGGAGCATCCTTTTCCA            |

4

5

6

7

1  
2  
3

## **Supplemental Figures and Figure Legends**



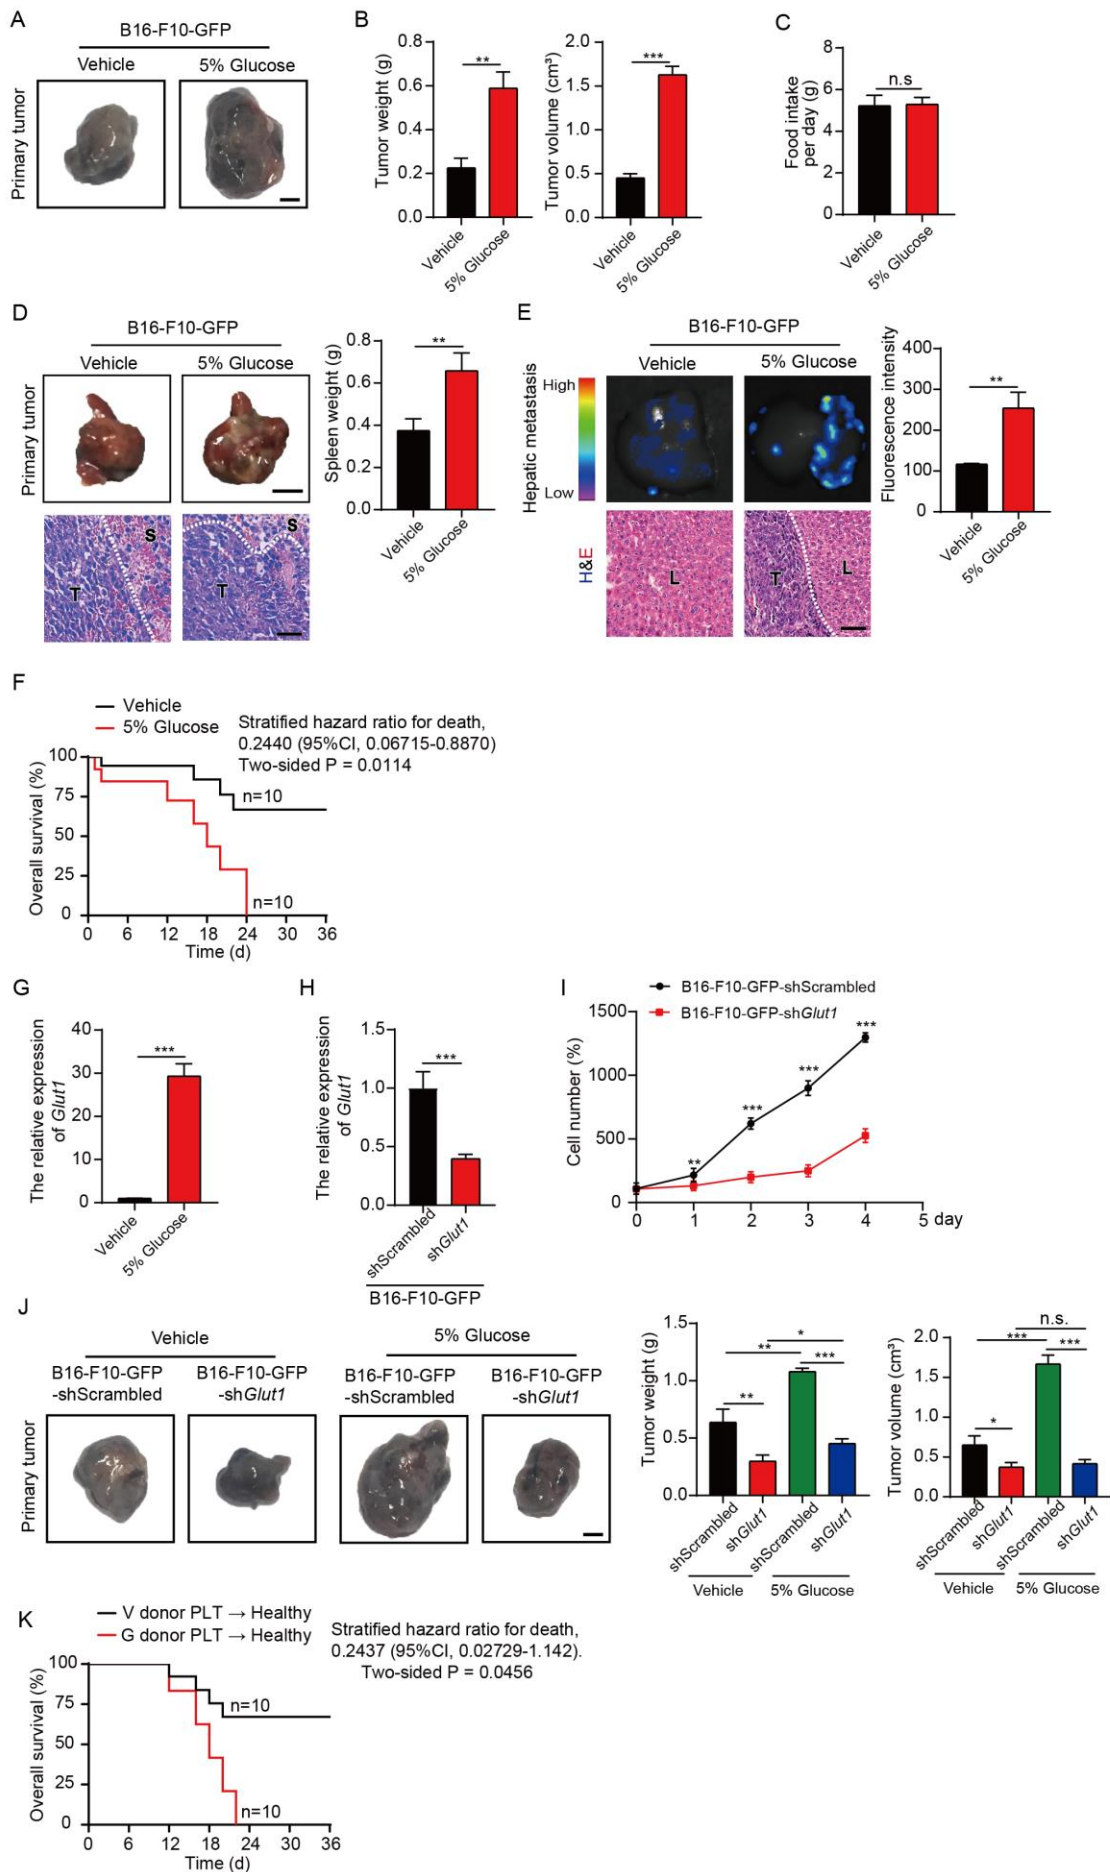

**Supplemental Figure 1. Glucose promotes tumor cell growth via GLUT1**

(A) Mice were treated with a 5% glucose solution and were subcutaneously implanted with B16-F10-GFP melanoma cells. Representative tumor pictures are shown. Scale bar, 2 mm. (B) Quantifications of tumor weight and tumor volume ( $n = 6$  animals per group). (C) Quantifications of food intake per day in control or 5% glucose treated tumor-bearing mice ( $n = 6$  animals per group). (D) Mice were treated with a 5% glucose solution and were surgically implanted with tumor cells in the spleen. Representative tumor pictures are shown. H&E histological analysis of the tumor. Dashed lines mark the borders between tumor and spleen tissues. S: Spleen; T: tumor. Scale bar in upper panels: 2 mm. Scale bar in lower panels: 100  $\mu$ m. Quantifications of spleen weight ( $n = 6$  animals per group). (E) Representative fluorescent micrographs of the liver. H&E histological analysis of liver metastases. Dashed lines mark the borders between tumor and liver tissues. L: liver; T: tumor. Scale bar in lower panels: 100  $\mu$ m. Quantifications of liver fluorescence intensity ( $n = 6$  animals per group). (F) Mice were treated with vehicle or 5% glucose for 7 days and were then injected i.v. with B16-F10-GFP tumor cells. Survivals of mice were monitored for 36 days. (G) qPCR quantification of *Glut1* mRNA expression levels in tumor implanted in control or hyperglycaemic mice ( $n = 6$  samples per group). (H) qPCR quantification of *Glut1* mRNA expression levels in B16-F10-GFP tumor cells transfected with or without *Glut1*-shRNA ( $n = 3$  samples per group). (I) Cell proliferation assay of B16-F10-GFP tumor cells transfected with or without *Glut1*-shRNA ( $n = 5$  samples per group). (J) Mice were treated with a 5% glucose solution and were i.v. injected with tumor cells transfected with or without sh*GLUT1*. Representative tumor pictures are shown. Scale bar, 2 mm. Quantifications of tumor weight and tumor volume ( $n = 6$  animals per group). (K) Platelets were isolated from control or hyperglycemic donor mice and were mixed with B16-F10-GFP

1 melanoma cells and co-injected into healthy recipient mice. Survivals of mice were  
2 monitored for 36 days. \* $p < 0.05$ ; \*\* $p < 0.01$ , \*\*\* $p < 0.001$ . NS = not significant. Data  
3 presented as mean  $\pm$  s.e.m..

4

5

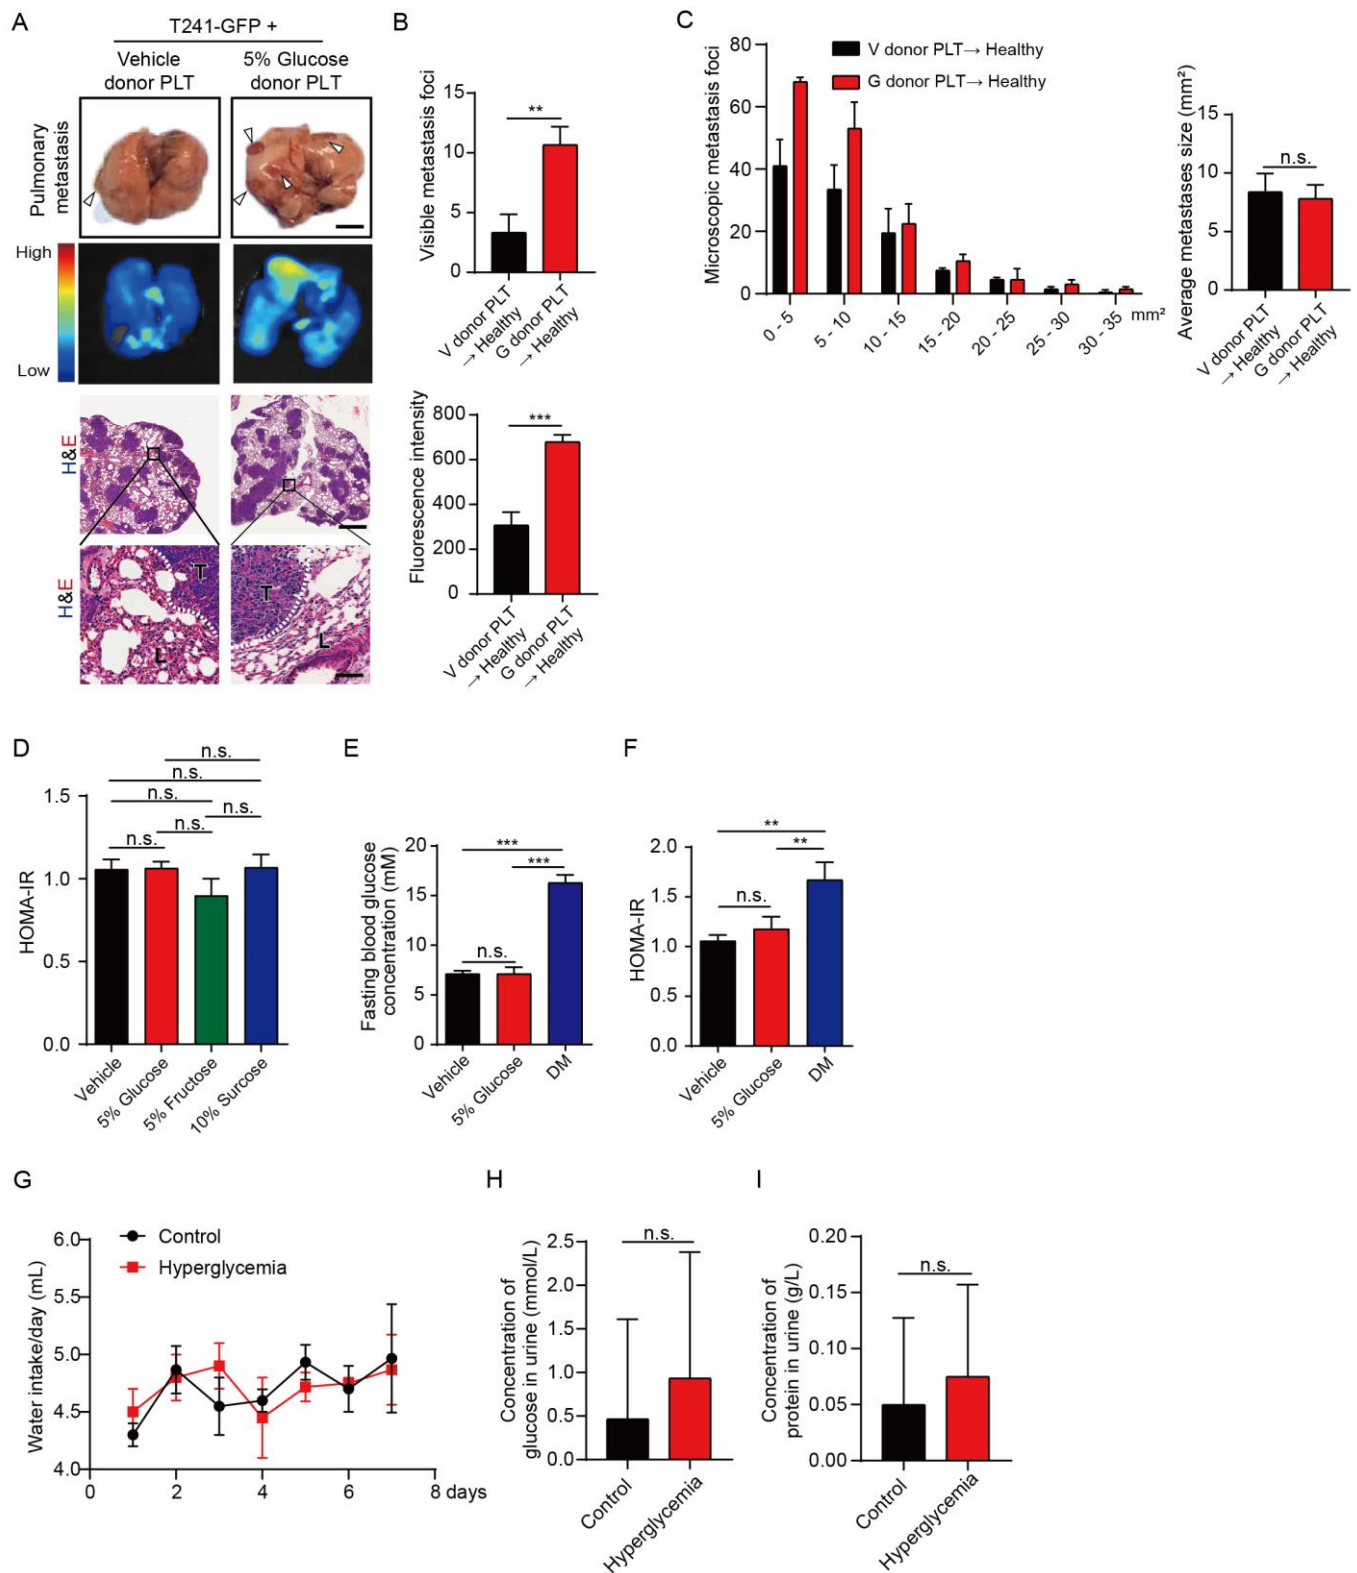

2 Supplemental Figure 2. Glucose promotes metastasis without altering insulin

3 sensitivity

1 (A) Platelets were isolated from control or hyperglycemic donor mice and were mixed  
2 with T241-GFP tumor cells and co-injected into healthy recipient mice. Representative  
3 lung pictures are shown. White arrowheads point to visible metastatic nodules. Scale  
4 bar in lung pictures: 3 mm. Representative fluorescent lung micrographs are shown.  
5 H&E histological analysis of lung metastasis. Dashed lines mark the borders between  
6 tumor and lung tissues. L: lung; T: tumor. Scale bar in upper panels: 2 mm. Scale bar  
7 in lower panels: 100  $\mu$ m. (B) Quantifications of visible surface lung metastatic nodules.  
8 Quantifications of lung fluorescence intensity ( $n = 8$  animals per group). (C)  
9 Quantifications of metastasis rate analysis. Whole lung microscopic metastasis  
10 distribution was analysed by size and number. Quantifications of average metastasis  
11 size ( $n = 8$  lungs per group). (D) HOMA-IR levels of the vehicle-, 5% glucose-, 5%  
12 fructose-, and 10% sucrose-treated mice ( $n = 6$  samples per group). (E-F) Fasting blood  
13 glucose levels and HOMA-IR levels in vehicle-treated, 5% glucose-treated, and STZ-  
14 induced diabetic mice ( $n = 6$  samples per group). (G-I) Healthy mice were treated with  
15 vehicle or 5% glucose for 7 days and the water intake, urine glucose, and urine protein  
16 levels were quantified ( $n = 6$  animals per group). \* $p < 0.05$ ; \*\* $p < 0.01$ , \*\*\* $p < 0.001$ . NS  
17 = not significant. Data presented as mean  $\pm$  s.e.m..

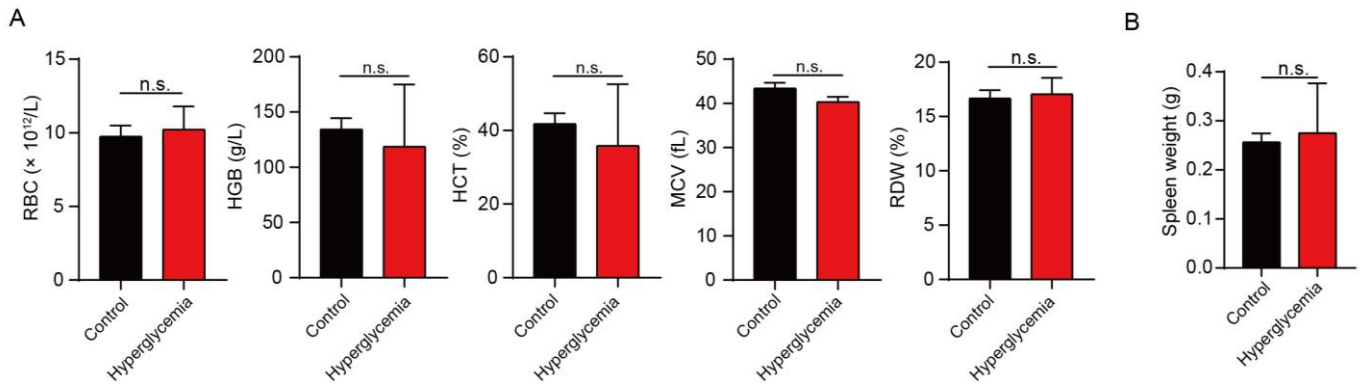

2

3 **Supplemental Figure 3. RBC parameters and spleen weight are not affected by**  
4 **hyperglycemia**

5 (A) RBC, HGB, HCT, MCV, and RDW analysis in whole blood from control or  
6 hyperglycaemic groups. ( $n = 6$  samples per group). (B) Quantifications of spleen weight  
7 in control and hyperglycemia groups ( $n = 6$  samples per group). NS = not significant.

8 Data presented as mean  $\pm$  s.e.m..

9

10

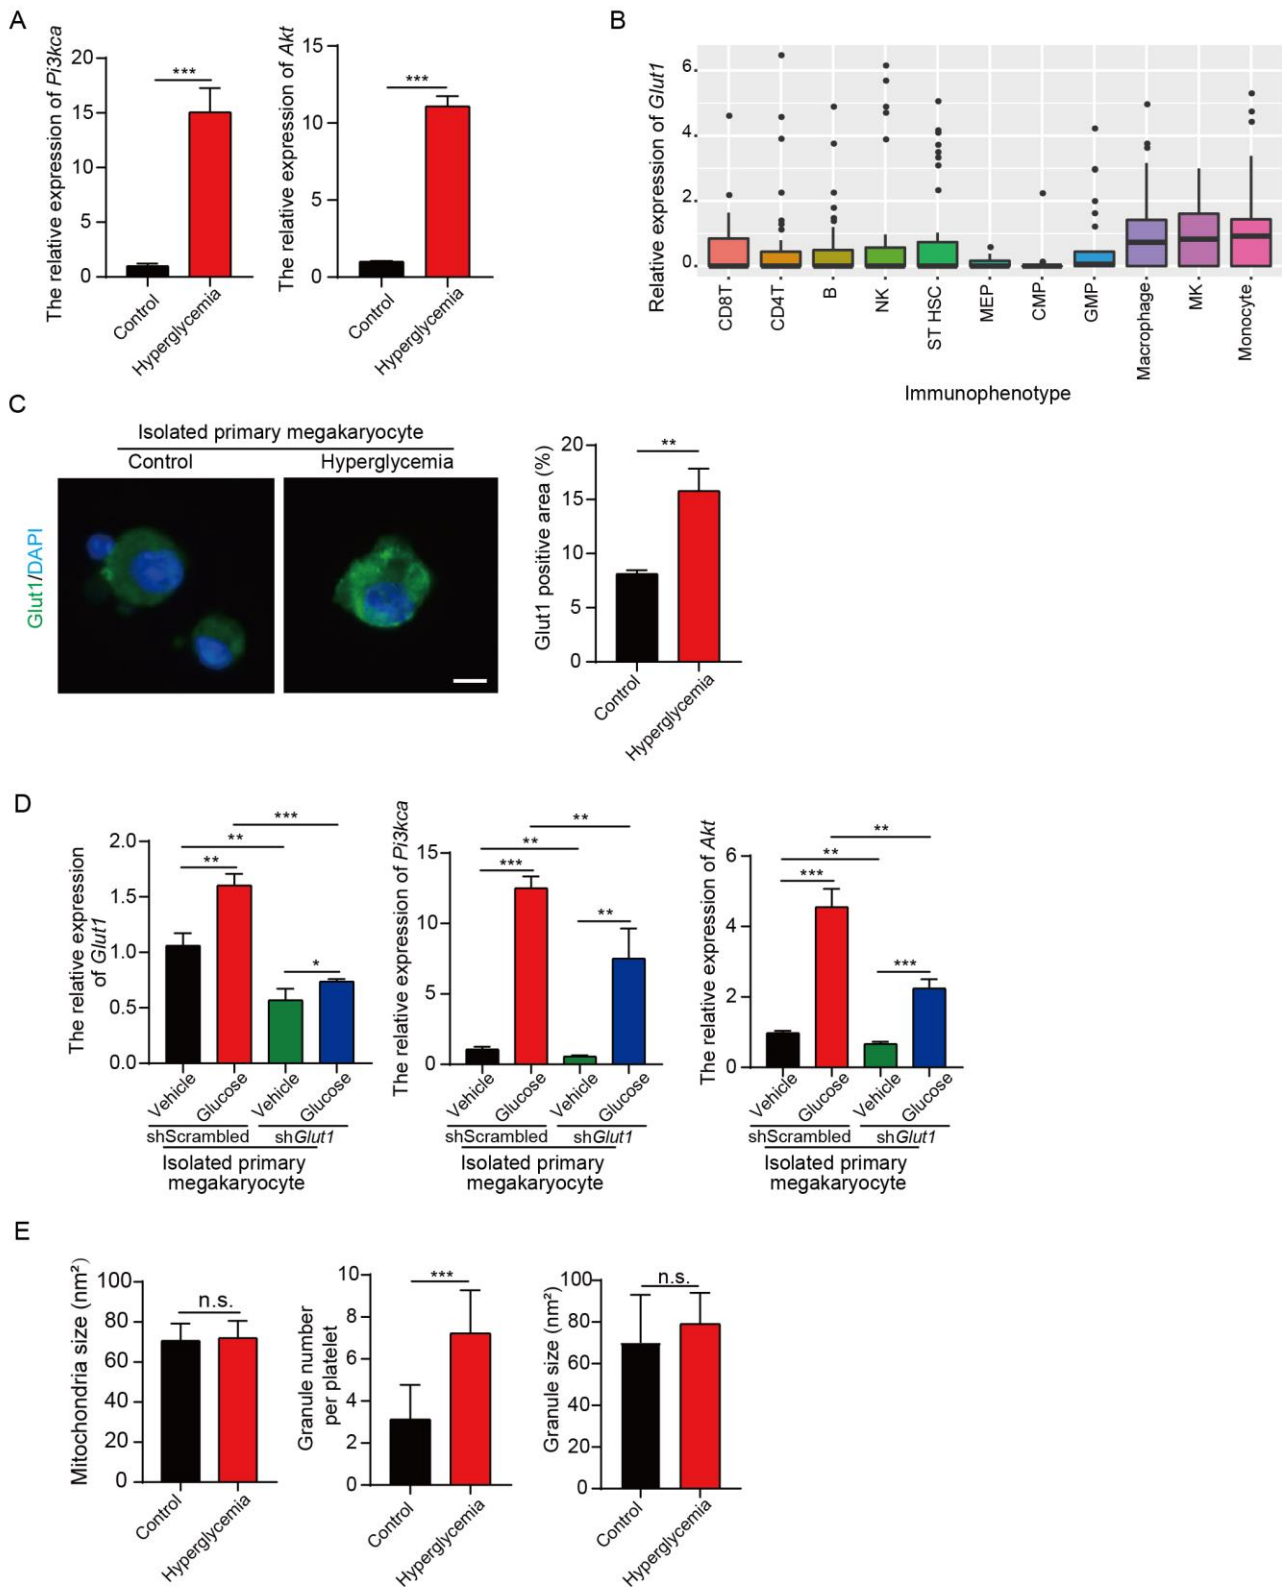

2  
3 **Supplemental Figure 4. Glucose activates MKs and increases platelet granule**  
4 **number**

1 (A) qPCR quantification of *Pik3ca* and *Akt* mRNA expression levels in MKs isolated  
2 from control or hyperglycemia group ( $n = 3$  samples per group). (B) *Glut1* expression  
3 levels in various cell types in bone marrow. Data were collected from the Atlas of  
4 Mouse Blood Cells. (C) GLUT1 (green) and DAPI (blue) immunofluorescent staining  
5 micrographs of isolated MKs from control or hyperglycaemic mice. Quantifications of  
6 GLUT1<sup>+</sup> signals per cell ( $n = 6$  random fields per group). Scale bar, 15  $\mu\text{m}$ . (D) Isolated  
7 healthy MKs were transfected with or without *Glut1*-shRNA and then treated with  
8 normal (5.5 mM) or high (12.5 mM) dose of glucose *in vitro*. qPCR quantification of  
9 *Glut1*, *Pik3ca* and *Akt* mRNA expression levels in various groups ( $n = 6$  samples per  
10 group). (E) Quantifications of mitochondria size, granule number, and granule size per  
11 platelet ( $n = 6$  random fields per group). \* $p < 0.05$ ; \*\* $p < 0.01$ , \*\*\* $p < 0.001$ . NS = not  
12 significant. Data presented as mean  $\pm$  s.e.m..

13

14



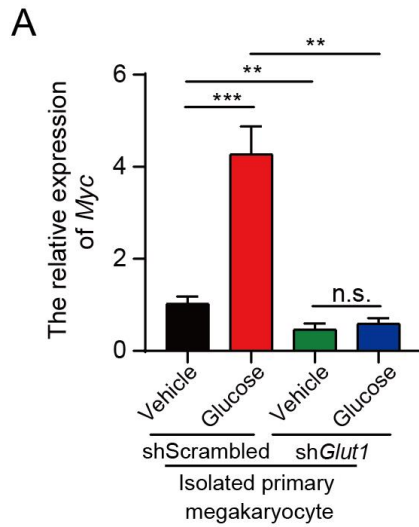

**Supplemental Figure 5. Glucose-driven MYC expression in MKs is GLUT1 dependent**

(A) Isolated healthy MKs were transfected with or without *Glut1*-shRNA and then treated with normal (5.5 mM) or high (12.5 mM) dose of glucose *in vitro*. qPCR quantification of *Myc* mRNA expression levels in various groups ( $n = 6$  samples per group). \*\* $p < 0.01$ ; \*\*\* $p < 0.001$ . NS = not significant. Data presented as mean  $\pm$  s.e.m..

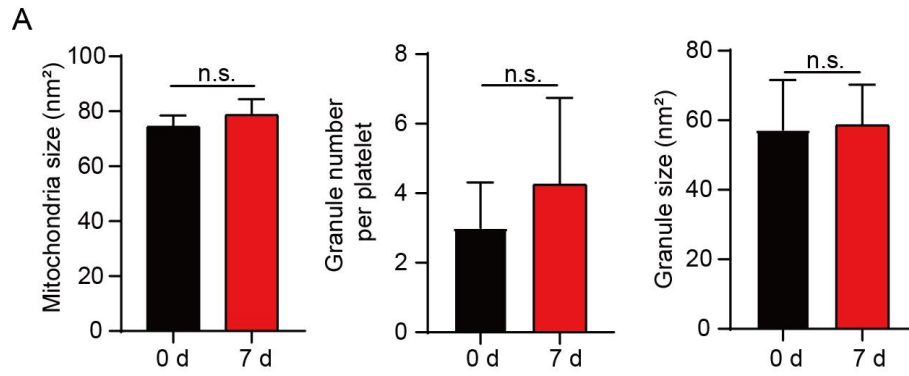

**Supplemental Figure 6. Glucose administration does not change mitochondria or granule sizes in human platelets**

(A) Quantifications of mitochondria size, granule number, and granule size per platelet ( $n = 6$  random fields per group). NS = not significant. Data presented as mean  $\pm$  s.e.m..
